# Supplementary material
Source: PubMed Central journal article supplement (PMC6145659)
Supplement: jamaophthalmol-e180776-s001.pdf [file jamaophthalmol-e180776-s001.pdf]

## Supplementary Online Content

Suwan Y, Fard MA, Geyman LS, et al. Association of myopia with peripapillary perfused capillary density in patients with glaucoma: an optical coherence tomography angiography study. *JAMA Ophthalmol*. Published online April 5, 2018. doi:10.1001/jamaophthalmol.2018.0776

**eTable 1.** Comparisons between MNG vs Control and NMG and MG.

**eTable 2.** Post hoc Comparisons of Global and Annular PCD.

**eTable 3.** Post hoc Comparisons of Sectoral PCD among NMG, MNG, and MG.

This supplementary material has been provided by the authors to give readers additional information about their work.

**eTable 1. Comparisons between MNG vs Control and NMG and MG.**

|                                                                                                                                                                                       | <b>Mean Difference (%)</b> | <b>95%Confidence Interval</b> |
|---------------------------------------------------------------------------------------------------------------------------------------------------------------------------------------|----------------------------|-------------------------------|
| MNG vs Control                                                                                                                                                                        |                            |                               |
| MD (dB)                                                                                                                                                                               | -0.59                      | -1.334, 0.162                 |
| PSD (dB)                                                                                                                                                                              | -0.063                     | -0.698, 0.573                 |
| RNFLT (microns)                                                                                                                                                                       | -8.213                     | -15.182, -1.249               |
| NMG vs MG                                                                                                                                                                             |                            |                               |
| MD (dB)                                                                                                                                                                               | 0.529                      | -1.849, 2.908                 |
| PSD (dB)                                                                                                                                                                              | -0.464                     | -1.737, 0.808                 |
| RNFLT (microns)                                                                                                                                                                       | -8.156                     | -12.654, -3.657               |
| Analyzed by Marginal Model of Generalized Estimating Equations Adjusted for Age                                                                                                       |                            |                               |
| MNG = myopia without glaucoma; NMG = glaucoma without myopia; MG = myopic glaucoma; MD = mean deviation; PSD = pattern standard deviation; RNFLT: retinal nerve fiber layer thickness |                            |                               |

**eTable 2. Post hoc Comparisons of Global and Annular PCD.**

| <b>Global PCD</b>  | <b>Control</b> | <b>NMG</b> | <b>MNG</b> | <b>MG</b> |
|--------------------|----------------|------------|------------|-----------|
| Control            | 1              | <0.001*    | 0.523      | <0.001*   |
| NMG                |                | 1          | 0.002*     | 0.002     |
| MNG                |                |            | 1          | <0.001*   |
| MG                 |                |            |            | 1         |
| <b>Annular PCD</b> | <b>Control</b> | <b>NMG</b> | <b>MNG</b> | <b>MG</b> |
| Control            | 1              | <0.001*    | 0.652      | <0.001*   |
| NMG                |                | 1          | 0.003*     | 0.007*    |
| MNG                |                |            | 1          | <0.001*   |
| MG                 |                |            |            | 1         |

Analyzed by Tukey's honest significant difference.

\* Shows the mean difference is significant at the 0.05 level.

PCD = peripapillary perfused capillary density; MNG = myopia without glaucoma; NMG = glaucoma without myopia; MG = myopic glaucoma

**eTable 3. Post hoc Comparisons of Sectoral PCD among NMG, MNG, and MG.**

| <b>NMG</b>                                                                            | <b>Superior</b> | <b>Nasal</b> | <b>Inferior</b> | <b>Temporal</b> |
|---------------------------------------------------------------------------------------|-----------------|--------------|-----------------|-----------------|
| Superior                                                                              | 1               | 0.314        | 0.011           | 0.002           |
| Nasal                                                                                 |                 | 1            | 0.002           | <0.001          |
| Inferior                                                                              |                 |              | 1               | 0.535           |
| Temporal                                                                              |                 |              |                 | 1               |
| <b>MNG</b>                                                                            |                 |              |                 |                 |
| Superior                                                                              | 1               | 0.548        | 0.832           | 0.016           |
| Nasal                                                                                 |                 | 1            | 0.468           | 0.052           |
| Inferior                                                                              |                 |              | 1               | 0.133           |
| Temporal                                                                              |                 |              |                 | 1               |
| <b>MG</b>                                                                             |                 |              |                 |                 |
| Superior                                                                              | 1               | 0.502        | <0.001          | <0.001          |
| Nasal                                                                                 |                 | 1            | 0.002           | 0.004           |
| Inferior                                                                              |                 |              | 1               | 0.949           |
| Temporal                                                                              |                 |              |                 | 1               |
| MNG = myopia without glaucoma; NMG = glaucoma without myopia;<br>MG = myopic glaucoma |                 |              |                 |                 |
